# Supplementary material for: Synthesis and characterization of two-dimensional carbon dots decorated with molybdenum oxide nanoflakes with various phases
Source: Royal Society of Chemistry journal article supplement (doi:10.1039/c6nj02175a), 2016-01-01

## **Synthesis of two-dimensional Molybdenum oxide nanoflakes with various phases and their nano-based characterization**

Mukesh Lavkush Bhaisare<sup>1</sup>, Krishna Hari Sharma<sup>5</sup>, Jun-Yi Lee<sup>1</sup>, Da-Ren Hang<sup>5</sup>, Hui-Fen Wu\*,<sup>1, 2, 3, 4</sup>

<sup>1</sup>Department of Chemistry and Center for Nanoscience and Nanotechnology, National Sun Yat-Sen University, Kaohsiung, 70, Lien-Hai Road, Kaohsiung, 80424, Taiwan

<sup>2</sup>School of Pharmacy, College of Pharmacy, Kaohsiung Medical University, Kaohsiung, 807, Taiwan

<sup>3</sup>Institute of Medical Science and Technology, National Sun Yat-Sen University, 80424, Taiwan

<sup>4</sup>Doctoral Degree Program in Marine Biotechnology, National Sun Yat-Sen University and Academia Sinica, Kaohsiung, 80424, Taiwan

<sup>5</sup>Department of Materials and Optoelectronic Science, National Sun Yat-Sen University, 70, Lien-Hai Road, Kaohsiung 80424, Taiwan

\*Corresponding author, Phone: +886-7-5252000 ext. 3955; Fax: +886-7-5253908

E-mail: [hwu@faculty.nsysu.edu.tw](mailto:hwu@faculty.nsysu.edu.tw) (Prof. H F Wu)

---

**Fig. S1** [a] EDX spectra of MoO<sub>3-x</sub> nanoflakes, [b, c, and d] C-dots@MoO<sub>3-x</sub> I, II and III.

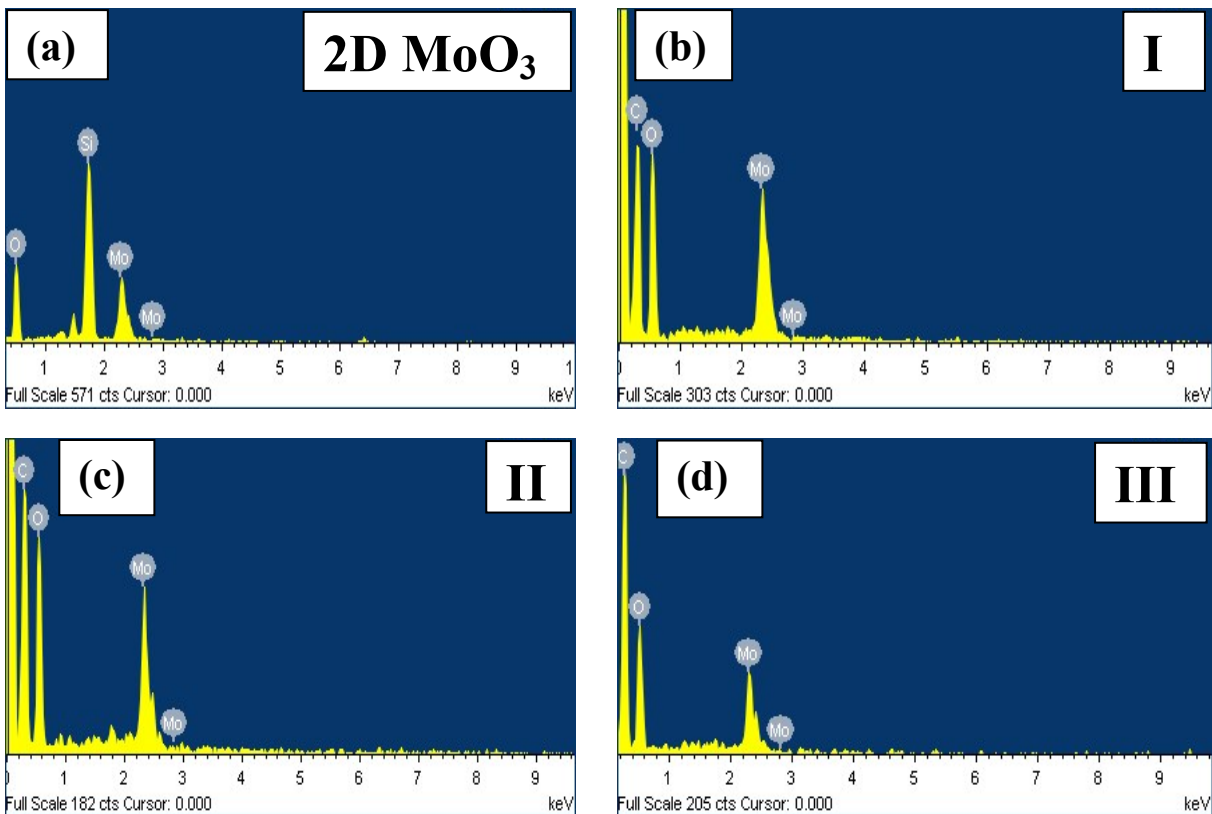

**Fig. S2** Particle size distribution of carbon dots.

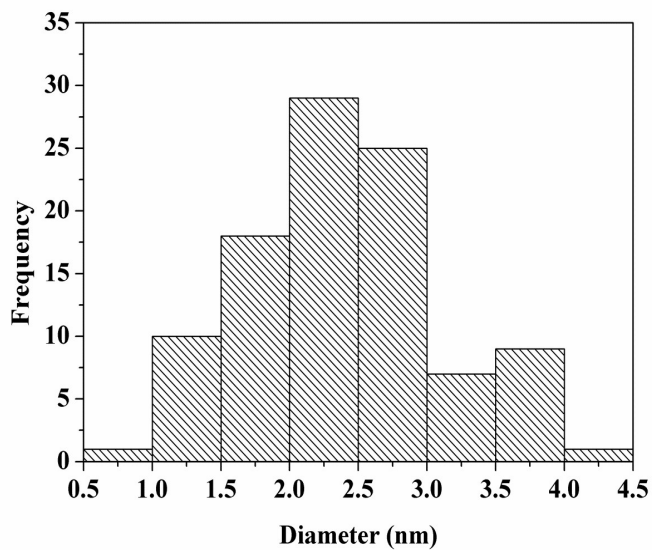

Supplement: c6nj02175a1.pdf [file c6nj02175a1.pdf]
